# Supplementary material for: Comprehensive analysis of expression and prognostic value of the claudin family in human breast cancer
Source: Aging (Albany NY). 2021 Mar 10;13(6):8777–96. doi: 10.18632/aging.202687 (PMC8034964; doi:10.18632/aging.202687)
Supplement: Supplementary Table 1 [file aging-13-202687-s002.pdf]

**Supplementary Table 1. Expression and functions of claudin in breast cancer.**

| Genes  | Types of cancer                                        | Expression level                        | Function role                                                              | References |
|--------|--------------------------------------------------------|-----------------------------------------|----------------------------------------------------------------------------|------------|
| CLDN1  | breast cancer vs normal                                | down                                    | NA                                                                         | [14]       |
|        | recurrent group BC vs non-recurrent group              | down                                    | correlated with disease-free interval and lymph node metastasis            | [15]       |
|        | TNBC                                                   | NA                                      | associated with worse relapse-free survival (RFS) and overall survival     | [16]       |
|        | basal-like breast cancer                               | up                                      | involved in epithelial-mesenchymal-transition (EMT)                        | [17]       |
|        | breast cancer cells                                    | NA                                      | silencing CLDN1 inhibited epithelial to mesenchymal transition (EMT)       | [18]       |
| CLDN2  | TNBC                                                   | NA                                      | associated with the risk of recurrence in the lymph node positive subgroup | [16]       |
|        | breast cancer vs normal                                | down                                    | associated with lymph node metastasis                                      | [19]       |
|        | BC liver metastases compared to other metastatic sites | up                                      | associated with metastasis-free interval                                   | [20]       |
|        | breast cancer vs normal                                | down                                    | NA                                                                         | [21]       |
| CLDN3  | breast cancer vs normal                                | no difference                           | NA                                                                         | [14]       |
|        | breast cancer                                          | up                                      | NA                                                                         | [22]       |
|        | TNBC                                                   | strong cytoplasmic claudin 3 expression | associated with survival.                                                  | [23]       |
| CLDN4  | breast cancer vs normal                                | no difference                           | NA                                                                         | [14]       |
|        | recurrent group BC vs non-recurrent group              | no significance                         | NA                                                                         | [15]       |
|        | TNBC                                                   | NA                                      | not associated with survival.                                              | [16]       |
|        | breast cancer                                          | up                                      | NA                                                                         | [22]       |
|        | basal-like                                             |                                         |                                                                            |            |
|        | group BC as compared to not basal-like                 | up                                      | NA                                                                         | [24]       |
|        | breast cancer                                          | NA                                      | correlated with tumour grade, Her2, ER and survival                        | [25]       |
| CLDN5  | breast carcinoma in situ                               | up                                      | claudin-4-low expression had a worse prognosis in carcinoma in situ        | [26]       |
|        | recurrent breast cancer                                | up                                      | with lower relapse-free survival (RFS)                                     | [27]       |
| CLDN6  | breast invasive ductal carcinomas                      | down                                    | correlated with lymph node metastasis                                      | [28]       |
|        | MCF-7/MDR cells                                        | NA                                      | High expression of CLDN6 confers chemoresistance on breast cancer          | [29]       |
|        | TNBC cell line MDAMB231                                | NA                                      | CLDN6 enhances chemoresistance to ADM                                      | [30]       |
|        | breast cancer vs normal                                | down                                    | NA                                                                         | [21]       |
| CLDN7  | TNBC                                                   | NA                                      | not associated with survival.                                              | [16]       |
|        | breast cancer                                          | up                                      | NA                                                                         | [22]       |
|        | TNBC                                                   | strong cytoplasmic claudin 7 expression | associated with survival                                                   | [23]       |
| CLDN11 | breast cancer vs normal                                | up                                      | NA                                                                         | [21]       |
| CLDN12 | estrogen receptor (ER)-negative breast cancer          | NA                                      | associated with survival.                                                  | [31]       |
| CLDN16 | breast cancer vs normal                                | up                                      | no significant association with overall survival                           | [32]       |
|        | node positive tumors compared to negative              | down                                    | associated with aggressive phenotype                                       | [33]       |
|        | breast cancer vs normal                                | down                                    | NA                                                                         | [21]       |

Note: “up” means high expression; “down” means low expression; BC; breast cancer; TNBC, triple negative breast cancer; NA, not available.
